# Supplementary material for: Altered bone marrow lymphopoiesis and interleukin-6-dependent inhibition of thymocyte differentiation contribute to thymic atrophy during Trypanosoma cruzi infection
Source: PubMed Central journal article supplement (PMC5392268; doi:10.18632/oncotarget.14886), 2017-01-28
Supplement: oncotarget-08-17551-s001.pdf [file oncotarget-08-17551-s001.pdf]

## Altered bone marrow lymphopoiesis and interleukin-6-dependent inhibition of thymocyte differentiation contribute to thymic atrophy during *Trypanosoma cruzi* infection

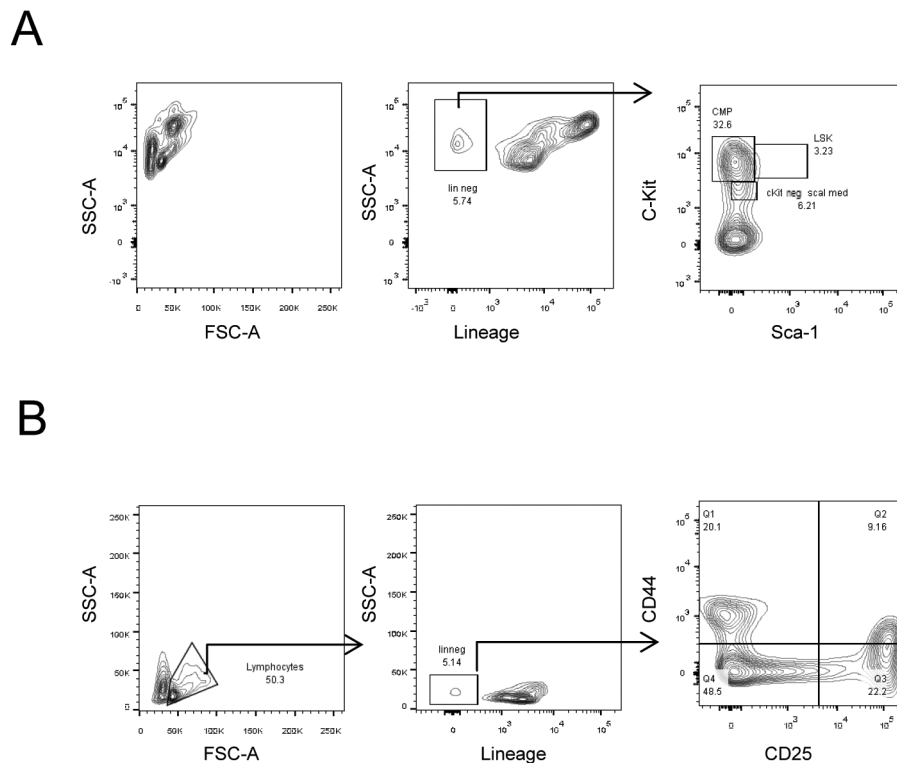

**Figure S1: Gating strategy followed for flow cytometry analysis.** Bone marrow cells and thymocytes were gated from SSC-A/FSC-A dot plots and showed two main populations. The thymocyte gate was drawn to exclude erythrocytes evidenced by Ter119 and CD71 staining (data not shown). (A) Hematopoietic precursor singlets from non-infected mice were gated from FSC-A/FSC-H and analyzed in Lineage/SSC-A dot plots and Lin<sup>neg</sup> cells were gated. Then CLPs were identified in Sca-1<sup>neg</sup> c-Kit<sup>med</sup> gate. (B) Gating of the Lineage<sup>neg</sup> thymocytes allowed us to analyze CD25 and CD44 dot plots and identify DN subpopulations (DN1, DN2, DN3 and DN4).

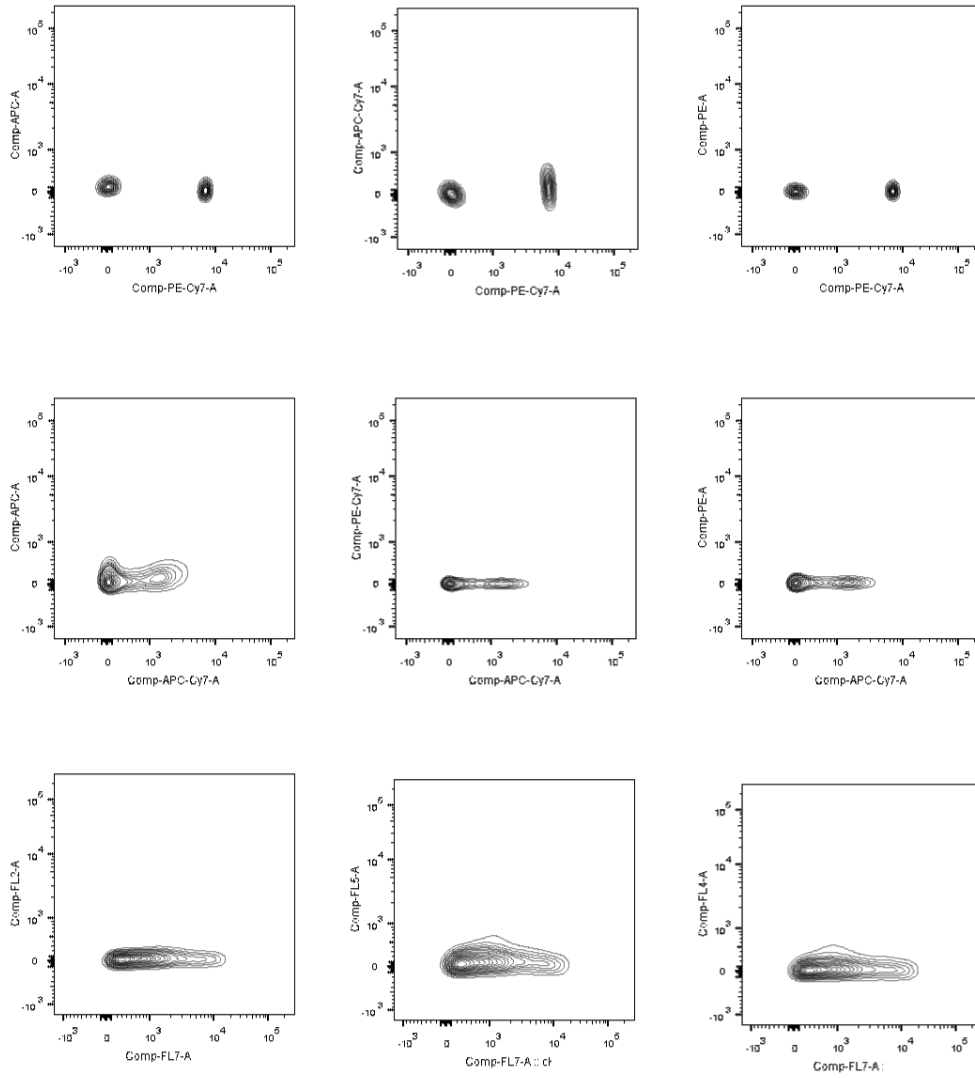

**Figure S2: Compensation controls for flow cytometry analysis.** Compensation controls using lymphocytes from non-infected mice and labeled antibodies.

**S1 Table: Antibodies for flow cytometry.** List of antibodies used in flow cytometry analysis including the target molecule, hybridoma clone, reference from provider and working dilution.

| Antibody             | Clone   | Reference  | Provider    | Dilution |
|----------------------|---------|------------|-------------|----------|
| anti CD4 FITC        | H129.19 | 553651     | BD          | 1:500    |
| anti CD4 PE          | (L3T4)  | 553049     | BD          | 1:500    |
| anti CD8 APC         | 53-6,7  | 551162     | BD          | 1:500    |
| anti CD8 PE          | 53-6,7  | 553032     | BD          | 1:500    |
| anti CD25 APC        | PC61,5  | 17-0251-82 | eBioscience | 1:500    |
| anti CD44 biotin     | IM7     | 553132     | BD          | 1:500    |
| Streptavidin APC-Cy7 |         | 554063     | BD          | 1:500    |
| anti Ter119 PE       | TER-119 | 12-5921-81 | eBioscience | 1:500    |
| anti cKit BV         | 2B8     | 562609     | eBioscience | 1:500    |
| anti Sca-1 PECy7     | D7      | 25-5981-81 | eBioscience | 1:500    |
| anti B220 PE         | RA3-6B2 | 553089     | BD          | 1:500    |
| anti CD11b PE        | M1/70   | 557397     | BD          | 1:500    |
| anti Gr1 PE          | RB6-8C5 | 12-5931-81 | eBioscience | 1:500    |
| anti CD49B PE        | DX5     | 553858     | BD          | 1:500    |

**S2 Table: Oligonucleotides for RTqPCR.** Forward and reverse oligonucleotide sequences used for *Il6*, *Il6ra* and *Il6st* gene expression analysis by RTqPCR.

| Gene         | Oligonucleotide sequence forward | Oligonucleotide sequence reverse |
|--------------|----------------------------------|----------------------------------|
| <i>Il6</i>   | 5'-accagaggaaatttcaatagc-3'      | 5'-tgatgcacttcagaaaaca-3'        |
| <i>Il6ra</i> | 5'-ggatgattcaggagcat-3'          | 5'-ggctcaciaaacagagaatgg-3'      |
| <i>Il6st</i> | 5'-tcattctctctatcggtc-3'         | 5'-ctgaggaccggtggtg-3'           |
